# Supplementary material for: Harmonisation of short-term in vitro culture for the expansion of antigen-specific CD8+ T cells with detection by ELISPOT and HLA-multimer staining
Source: Springer Nature journal article supplement (doi:10.1007/s00262-014-1593-0), 2014-08-18
Supplement: MOESM1 [file 8232738]

Cancer Immunology, Immunotherapy (submitted in 2014)- Lindsey Chudley *et al.*

### Supplementary MIATA Information

| Module 1 – Sample PHASE I/II             |                                                                  | Prepared in central laboratory                                                                                                                                                                                                       |                  |                    |                    |                 |                 |
|------------------------------------------|------------------------------------------------------------------|--------------------------------------------------------------------------------------------------------------------------------------------------------------------------------------------------------------------------------------|------------------|--------------------|--------------------|-----------------|-----------------|
| <b>1A – Donor</b>                        | Essential donor information                                      | 5 HLA-A2+ healthy volunteers (3 used in Phase I, 2 in Phase II)                                                                                                                                                                      |                  |                    |                    |                 |                 |
| <b>1B – Source</b>                       | Source                                                           | National Blood Service                                                                                                                                                                                                               |                  |                    |                    |                 |                 |
|                                          | Collection method                                                | PBMCs were isolated from anonymised buffy cones (HIV status negative) obtained from the National Blood Service, Southampton University Hospitals NHS Foundation Trust.                                                               |                  |                    |                    |                 |                 |
|                                          | Processing methodology                                           | Ficoll density gradient separation, washed twice in RPMI 1640 + 1mM sodium pyruvate, 1% PSG (Invitrogen Ltd, Paisley, UK). PBMC were counted and stored in 1mL aliquots at 1-2x10 <sup>7</sup> /vial depending on total cell number. |                  |                    |                    |                 |                 |
| <b>1C – Cryopreservation and storage</b> | Fresh/Cryo?                                                      | Cryopreserved                                                                                                                                                                                                                        |                  |                    |                    |                 |                 |
|                                          | Freezing process                                                 | PBMC aliquots were stored in liquid nitrogen until shipment on dry ice to participating centres, where they were returned to liquid nitrogen until required.                                                                         |                  |                    |                    |                 |                 |
|                                          | Medium used for freezing                                         | RPMI + P/S + sodium pyruvate + 50% human AB serum, 10% DMSO                                                                                                                                                                          |                  |                    |                    |                 |                 |
| <b>1D – Cell counting</b>                | <b>Mean yield and viability</b>                                  | <b>Centre A</b>                                                                                                                                                                                                                      | <b>Centre B</b>  | <b>Centre C</b>    | <b>Centre D</b>    | <b>Centre E</b> | <b>Centre F</b> |
|                                          | Cell recovery after thawing (Phase I, Donors 1-3)<br>Mean; range | 78.0;<br>60.5-101                                                                                                                                                                                                                    | 40.6;<br>30-49   | 56.7;<br>36.8-90.5 | 51.1;<br>31.7-73   | 64.9;<br>42-87  | N/A             |
|                                          | Cell viability after thawing (Phase I Donors 1-3)<br>Mean; range | 67.4;<br>58.4-72.9                                                                                                                                                                                                                   | 90;<br>87-91     | 94.6;<br>83.3-100  | 80.2;<br>75.4-84.2 | 96.8;<br>93-99  | N/A             |
|                                          | Cell recovery after thawing (Phase II Donors 4-5)<br>Mean; range | 77.0;<br>60-85.5                                                                                                                                                                                                                     | 57.7;<br>38-65   | 61.3;<br>50.1-72.7 | 64.4;<br>56.2-70.9 | 94.5;<br>78-109 | 76;<br>61-97    |
|                                          | Cell viability after thawing (Phase II Donors 4-5)               | 76.6;<br>68.2-86.1                                                                                                                                                                                                                   | 88.9;<br>88-89.7 | 86.6;<br>77.3-93   | 84.1;<br>79.9-86.8 | 92.8;<br>87-94  | 96.3;<br>94-99  |

|                                                          |                                 |                                                         |                                              |                                              |                           |                                |                                |
|----------------------------------------------------------|---------------------------------|---------------------------------------------------------|----------------------------------------------|----------------------------------------------|---------------------------|--------------------------------|--------------------------------|
|                                                          | Mean; range                     |                                                         |                                              |                                              |                           |                                |                                |
|                                                          | Cell counting method            | Trypan Blue and haemocytometer                          | Guava Counter (ViaCount)                     | Trypan Blue and haemocytometer               | Guava Cell Counter PCA-96 | Trypan Blue and haemocytometer | Trypan Blue and haemocytometer |
| <b>Module 2 – Assay PHASE I IVS protocol</b>             |                                 | <b>Centre A</b>                                         | <b>Centre B</b>                              | <b>Centre C</b>                              | <b>Centre D</b>           | <b>Centre E</b>                | <b>Centre F</b>                |
|                                                          | Resting phase                   | No                                                      | Overnight                                    | Overnight                                    | No                        | 4 hours                        | N/A                            |
|                                                          | Cell number (per well)          | 1-2x10 <sup>6</sup>                                     | 5x10 <sup>6</sup>                            | 5x10 <sup>6</sup>                            | 4-5x10 <sup>6</sup>       | 2x10 <sup>6</sup>              | N/A                            |
|                                                          | Well volume                     | 1ml                                                     | 2ml                                          | Up to 2ml                                    | 2ml                       | 2ml                            | N/A                            |
|                                                          | Plate                           | 24-well                                                 | 24-well                                      | 24-well                                      | 24-well                   | 12-well                        | N/A                            |
|                                                          | Medium; source                  | IMDM; Lonza                                             | IMDM; Invitrogen                             | IMDM; Lonza                                  | X Vivo 15; Lonza          | X Vivo 15; Lonza               | N/A                            |
|                                                          | % human AB serum; source        | 10%; PAA                                                | 10%; Lonza                                   | 10%; Lonza                                   | 10%; PAN Biotech          | 5%; Lonza                      | N/A                            |
|                                                          | Peptide stimulation             | Single                                                  | Pool                                         | Pool                                         | Pool                      | Single                         | N/A                            |
|                                                          | Peptide concentration           | 5µg/ml                                                  | 1µg/ml                                       | 1µg/ml                                       | 1µg/ml                    | 10µg/ml                        | N/A                            |
|                                                          | Feeder cytokines; concentration | IL-2, 5ng/mL<br>IL-15, 100IU/mL<br>TCGF (Gentaur), 10%  | IL-2, 2ng/mL<br>IL-4, 5ng/mL<br>IL-7, 5ng/mL | IL-2, 2ng/mL<br>IL-4, 5ng/mL<br>IL-7, 5ng/mL | IL-2, 20IU/mL             | IL-2, 20IU/mL                  | N/A                            |
|                                                          | Length of IVS (days)            | 7                                                       | 12                                           | 13                                           | 13                        | 9                              | N/A                            |
| <b>Module 2 – Assay PHASE II Harmonised IVS protocol</b> |                                 | <b>Same protocol used by every centre (Centres A-F)</b> |                                              |                                              |                           |                                |                                |
|                                                          | Resting phase                   | No                                                      |                                              |                                              |                           |                                |                                |
|                                                          | Cell number (per well)          | 4-5x10 <sup>6</sup>                                     |                                              |                                              |                           |                                |                                |
|                                                          | Well volume                     | 2ml                                                     |                                              |                                              |                           |                                |                                |
|                                                          | Plate                           | 24-well                                                 |                                              |                                              |                           |                                |                                |
|                                                          | Medium; source                  | X Vivo 15; Lonza                                        |                                              |                                              |                           |                                |                                |
|                                                          | % human AB serum; source        | 10%; Lonza                                              |                                              |                                              |                           |                                |                                |
|                                                          | Peptide stimulation             | Pool                                                    |                                              |                                              |                           |                                |                                |

|                                                                 |                                              |                               |                                                                       |                                               |                                                                     |                                                |                                                                              |
|-----------------------------------------------------------------|----------------------------------------------|-------------------------------|-----------------------------------------------------------------------|-----------------------------------------------|---------------------------------------------------------------------|------------------------------------------------|------------------------------------------------------------------------------|
|                                                                 | Peptide concentration                        | 1µg/ml                        |                                                                       |                                               |                                                                     |                                                |                                                                              |
|                                                                 | Feeder cytokines; concentration              | IL-2, 20IU/mL                 |                                                                       |                                               |                                                                     |                                                |                                                                              |
|                                                                 | Length of IVS (days)                         | 13                            |                                                                       |                                               |                                                                     |                                                |                                                                              |
|                                                                 |                                              |                               |                                                                       |                                               |                                                                     |                                                |                                                                              |
| <b>Module 2 – Assay PHASE I/II Ex vivo and post-IVS ELISPOT</b> |                                              | <b>Centre A</b>               | <b>Centre B</b>                                                       | <b>Centre C</b>                               | <b>Centre D</b>                                                     | <b>Centre E</b>                                | <b>Centre F</b>                                                              |
| <b>2A – Medium/serum</b>                                        | Medium/(serum) details                       | IMDM + 10%hAB (PAA) w/o DNase | OpTmizer CTS T cell expansion SFM + supplement (Invitrogen A10485-01) | IMDM (Lonza BE12-722F) +P/S +50uM bME +10% HS | X-Vivo (Lonza) +10% hAB serum (PAN), Glutamine (Gibco), P/S (Lonza) | RPMI (Gibco/PAA) + 10%hAB serum (Lonza) +P/S/G | X-vivo 15 (Lonza) +1% P/S (PAA), 1% L-Glutamine (PAA), 10% hAB sérum (Lonza) |
| <b>2B – Assay</b>                                               | Resting phase? Ex vivo (Phase I)             | o/n                           | 2h                                                                    | o/n                                           | 22hrs                                                               | 4hrs                                           | N/A                                                                          |
|                                                                 | Resting phase? Post-IVS Phase I Phase II     | No<br>No                      | No<br>No                                                              | No<br>No                                      | No<br>No                                                            | Yes<br>No                                      | N/A<br>No                                                                    |
|                                                                 | Number of cells per well ex vivo (Phase I)   | 400,000                       | 100,000 or 250,000                                                    | 400,000                                       | 400,000                                                             | 400,000                                        | N/A                                                                          |
|                                                                 | Number of cells per well post-IVS (Phase I)  | 5,000                         | 150,000 /100,000                                                      | 5,000 /25,000                                 | 75,000 (+75,000 K562-A2)                                            | 5,000                                          | N/A                                                                          |
|                                                                 | Number of cells per well post-IVS (Phase II) | 10,000 or 100,000             | 10,000 or 100,000                                                     | 10,000 or 100,000                             | 10,000 or 100,000                                                   | 10,000 or 100,000                              | 10,000 or 100,000                                                            |
|                                                                 | Concentration of peptide (Phase I/II)        | 1 µg/mL                       | 1 µg/mL                                                               | 1 µg/mL                                       | 1 µg/mL                                                             | 1 µg/mL                                        | 1 µg/mL                                                                      |
|                                                                 | How long were cells cultured?                | 18-20hrs                      | 18hr                                                                  | 26hrs                                         | 22hrs                                                               | 16-20hrs                                       | 16hrs                                                                        |
|                                                                 | Plate type                                   | Nitrocellulose backed         | Multiscreen HTS-HA filter                                             | Multiscreen HTS HA opaque                     | 96 well plate BD Biosciences                                        | Multiscreen-IP 96 separation                   | Multiscreen filter plates                                                    |

|                                              |                         |                                                                                                            |                                                                     |                                                                                                            |                                                                |                                                                            |                                        |
|----------------------------------------------|-------------------------|------------------------------------------------------------------------------------------------------------|---------------------------------------------------------------------|------------------------------------------------------------------------------------------------------------|----------------------------------------------------------------|----------------------------------------------------------------------------|----------------------------------------|
|                                              |                         | multiscreen 96-well plates (Millipore MSHA S4510)                                                          | plate (Millipore, MAHAS4510)                                        | plates (Millipore MSHAN4B50)                                                                               | (551849)                                                       | system, (Millipore MAIPS4510)                                              | (Millipore, MAHAS4510)                 |
|                                              | Coating Ab              | Anti-human IFN gamma Mab-1-D1K (Mabtech 3420-3-1000)                                                       | Anti-human IFN gamma; Klon Mab 1-D1K; 1mg/mL (Mabtech 3420-3-1000)  | Anti-human IFN gamma Mab-1-D1K (Mabtech 3420-3-1000)                                                       | Purified anti-human IFN gamma (BD 51-2555KC)                   | Anti-human IFN gamma Mab-1-D1K (Mabtech 3420-3-1000)                       | Kit from DIACLONE 856.051.020          |
|                                              | Detecting Ab            | Anti-human IFN gamma Mab-7-B6-1 biotinylated (Mabtech, 3420-6-1000)                                        | Anti-human IFN gamma Mab-7-B6-1 biotinylated (Mabtech, 3420-6-1000) | Anti-human IFN gamma Mab-7-B6-1 biotinylated (Mabtech, 3420-6-1000)                                        | Anti-human IFN gamma biotinylated (BD 51-1890KC)               | Anti-human IFN gamma Mab-7-B6-1 biotinylated (Mabtech, 3420-6-1000)        | Kit from DIACLONE 856.051.020          |
|                                              | Detecting reagent       | Extravidin-ALP (Sigma E-2636) 1:1000 diluted in PBS BCIP/NBT-Alkaline phosphatase substrate (Sigma B-5655) | SigmaFAST BCIP/NBT (Sigma B-5655)                                   | Extravidin-ALP (Sigma E-2636) 1:1000 diluted in PBS BCIP/NBT-Alkaline phosphatase substrate (Sigma B-5655) | Streptavidin-HRP (BD 51-9000209) AEC substrate set (BD 551951) | Streptavidin-ALP (Mabtech) BCIP/NBT-Alkaline phosphatase substrate (Zymed) | Kit from DIACLONE 856.051.020 BCIP/NBT |
| <b>2C – Controls</b>                         | Internal assay controls | Media only, HIV peptide control and PHA/SEB                                                                |                                                                     |                                                                                                            |                                                                |                                                                            |                                        |
| <b>Module 3 – Data acquisition (ELISPOT)</b> |                         | <b>Centre A</b>                                                                                            | <b>Centre B</b>                                                     | <b>Centre C</b>                                                                                            | <b>Centre D</b>                                                | <b>Centre E</b>                                                            | <b>Centre F</b>                        |
| <b>3A – Equipment and software</b>           | ELISPOT reader          | BioSys 5000 from Bio-Sys company, Karben, Germany                                                          | CTL ImmunoSpot Analyzer serial number: 029038                       | CTL Europe GmbH; Immunospot® Series 5 Core Analyzer                                                        | CTL ImmunoSpot® Series 3B Analyzer                             | A.I.D. ELISPOT Plate Reader ELR04                                          | Bioreader 5000 BioSys                  |
|                                              | ELISPOT software        | Bioreader 10                                                                                               | CTL Immunospot 5.0 Pro DC                                           | Immunocapture 6.1, Immunospot® Analysis software 4.0                                                       | CTL Immunospot Software                                        | A.I.D. ELISPOT Software                                                    | Bioreader 10.8                         |

|                                             |                                                                        |                                                                                                                                                                                                                                                                                                                                                                                                                                                                                                                                                                                           |                              |                                 |                                 |                               |                               |
|---------------------------------------------|------------------------------------------------------------------------|-------------------------------------------------------------------------------------------------------------------------------------------------------------------------------------------------------------------------------------------------------------------------------------------------------------------------------------------------------------------------------------------------------------------------------------------------------------------------------------------------------------------------------------------------------------------------------------------|------------------------------|---------------------------------|---------------------------------|-------------------------------|-------------------------------|
| <b>3B – Acquisition strategy and gating</b> | Strategy for establishment of spot detecting parameters                | Each centre used established parameters for detecting spots tailored to the specific reader, software design and algorithms.                                                                                                                                                                                                                                                                                                                                                                                                                                                              |                              |                                 |                                 |                               |                               |
|                                             | Representative data set:<br>Post-IVS<br>ELISPOT<br>Phase II<br>Donor 5 | 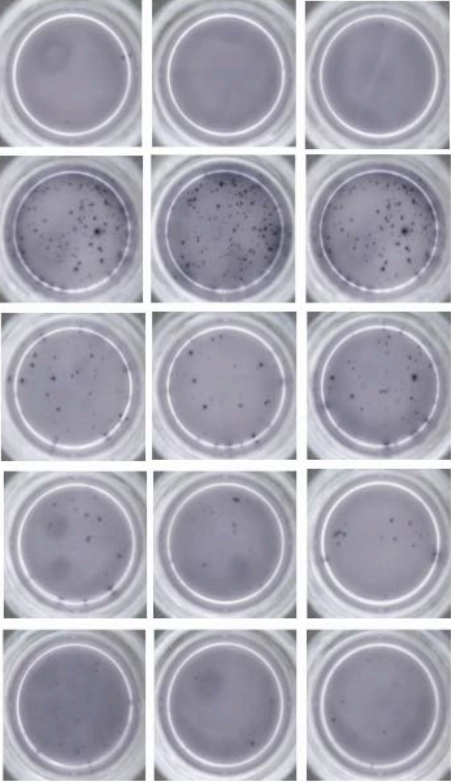 <p>The image displays a 5x3 grid of ELISPOT assay results. The rows are labeled on the right as 'Cells only', 'EBV', 'FLU', 'WT1', and 'HIV'. Each row contains three circular wells representing different centres. The 'Cells only' row shows a uniform grey background with no spots. The 'EBV', 'FLU', and 'WT1' rows show numerous dark spots of varying sizes, indicating a positive response. The 'HIV' row shows a uniform grey background with no spots, indicating a negative response.</p> |                              |                                 |                                 |                               |                               |
|                                             | Mean IFN- $\gamma$<br>SFC/million<br>Donors 1-3 (I)<br>Donors 4-5 (II) | <b>Centre A</b>                                                                                                                                                                                                                                                                                                                                                                                                                                                                                                                                                                           | <b>Centre B</b>              | <b>Centre C</b>                 | <b>Centre D</b>                 | <b>Centre E</b>               | <b>Centre F</b>               |
|                                             | <b>Phase I –<br/>FLU response</b>                                      | Ex vivo: 138<br>Post-IVS: 21933                                                                                                                                                                                                                                                                                                                                                                                                                                                                                                                                                           | Ex vivo: 96<br>Post-IVS: 288 | Ex vivo: 145<br>Post-IVS: 20225 | Ex vivo: 144<br>Post-IVS: 26615 | Ex vivo: 74<br>Post-IVS: 7083 | Ex vivo: N/A<br>Post-IVS: N/A |
|                                             | <b>Phase I –<br/>CMV response</b>                                      | Ex vivo: ND<br>Post-IVS: 2467                                                                                                                                                                                                                                                                                                                                                                                                                                                                                                                                                             | Ex vivo: ND<br>Post-IVS: ND  | Ex vivo: ND<br>Post-IVS: ND     | Ex vivo: ND<br>Post-IVS: ND     | Ex vivo: ND<br>Post-IVS: ND   | Ex vivo: N/A<br>Post-IVS: N/A |
|                                             | <b>Phase I –<br/>HIV response</b>                                      | Ex vivo: ND<br>Post-IVS: ND                                                                                                                                                                                                                                                                                                                                                                                                                                                                                                                                                               | Ex vivo: ND<br>Post-IVS: ND  | Ex vivo: ND<br>Post-IVS: ND     | Ex vivo: ND<br>Post-IVS: ND     | Ex vivo: ND<br>Post-IVS: ND   | Ex vivo: N/A<br>Post-IVS: N/A |

|                                                                           |                                                                          |                                                                                                                                                                                                                                                                                                             |                                                                                                                            |                                                                                                                                                     |                                                                                              |                                                                                                                                      |                                                      |
|---------------------------------------------------------------------------|--------------------------------------------------------------------------|-------------------------------------------------------------------------------------------------------------------------------------------------------------------------------------------------------------------------------------------------------------------------------------------------------------|----------------------------------------------------------------------------------------------------------------------------|-----------------------------------------------------------------------------------------------------------------------------------------------------|----------------------------------------------------------------------------------------------|--------------------------------------------------------------------------------------------------------------------------------------|------------------------------------------------------|
|                                                                           | <b>Phase II – EBV response</b>                                           | Ex vivo: N/A<br>Post-IVS:15406                                                                                                                                                                                                                                                                              | Ex vivo: N/A<br>Post -VS: 472                                                                                              | Ex vivo: N/A<br>Post-IVS: 2228                                                                                                                      | Ex vivo: N/A<br>Post-IVS: 16527                                                              | Ex vivo: N/A<br>Post-IVS: 16945                                                                                                      | Ex vivo: N/A<br>Post-IVS: 10711                      |
|                                                                           | <b>Phase II – FLU response</b>                                           | Ex vivo: N/A<br>Post-IVS: 2456                                                                                                                                                                                                                                                                              | Ex vivo: N/A<br>Post-IVS: 1267                                                                                             | Ex vivo: N/A<br>Post-IVS: ND                                                                                                                        | Ex vivo: N/A<br>Post-IVS: 1084                                                               | Ex vivo: N/A<br>Post-IVS: 1645                                                                                                       | Ex vivo: N/A<br>Post-IVS: 2200                       |
|                                                                           | <b>Phase II – WT1 response</b>                                           | Ex vivo: N/A<br>Post-IVS: ND                                                                                                                                                                                                                                                                                | Ex vivo: N/A<br>Post-IVS: ND                                                                                               | Ex vivo: N/A<br>Post-IVS: ND                                                                                                                        | Ex vivo: N/A<br>Post-IVS: ND                                                                 | Ex vivo: N/A<br>Post-IVS: ND                                                                                                         | Ex vivo: N/A<br>Post-IVS: ND                         |
|                                                                           | <b>Phase II – HIV response</b>                                           | Ex vivo: N/A<br>Post-IVS: ND                                                                                                                                                                                                                                                                                | Ex vivo: N/A<br>Post-IVS: ND                                                                                               | Ex vivo: N/A<br>Post-IVS: ND                                                                                                                        | Ex vivo: N/A<br>Post-IVS:ND                                                                  | Ex vivo: N/A<br>Post-IVS: ND                                                                                                         | Ex vivo: N/A<br>Post-IVS: ND                         |
| <b>Module 4 – Results (ELISPOT)</b>                                       |                                                                          | <b>Centre A</b>                                                                                                                                                                                                                                                                                             | <b>Centre B</b>                                                                                                            | <b>Centre C</b>                                                                                                                                     | <b>Centre D</b>                                                                              | <b>Centre E</b>                                                                                                                      | <b>Centre F</b>                                      |
| <b>4A – Raw data</b>                                                      | Cut off specifications and # of tests OOS                                | Phase I, 1 replicate post-IVS ELISPOT all donors                                                                                                                                                                                                                                                            | N/A                                                                                                                        | N/A                                                                                                                                                 | N/A                                                                                          | N/A                                                                                                                                  | N/A                                                  |
|                                                                           | Accessibility of raw data addressed?                                     | Raw data is held at each centre and analysed data can be made available upon request.                                                                                                                                                                                                                       |                                                                                                                            |                                                                                                                                                     |                                                                                              |                                                                                                                                      |                                                      |
| <b>4B – Response determination</b>                                        | Definition of positive reactivity (above background) incl. tests applied | An antigen-specific response was reported if the mean was both $\geq 20$ (ex vivo) or $\geq 500$ (post-IVS) SFC per million PBMCs and 2 SD above the mean of HIV stimulated wells. HIV-specific responses were reported if the mean was $\geq 20$ (ex vivo) or $\geq 500$ (post-IVS) SFC per million PBMCs. |                                                                                                                            |                                                                                                                                                     |                                                                                              |                                                                                                                                      |                                                      |
|                                                                           | Response definition pre-defined or post-hoc                              | Pre-defined                                                                                                                                                                                                                                                                                                 |                                                                                                                            |                                                                                                                                                     |                                                                                              |                                                                                                                                      |                                                      |
| <b>Module 2 – Assay PHASE I/II Ex vivo and post-IVS Multimer staining</b> |                                                                          | <b>Centre A</b>                                                                                                                                                                                                                                                                                             | <b>Centre B</b>                                                                                                            | <b>Centre C</b>                                                                                                                                     | <b>Centre D</b>                                                                              | <b>Centre E</b>                                                                                                                      | <b>Centre F</b>                                      |
| <b>2A – Medium/serum</b>                                                  | Wash/staining buffers                                                    | PBS + 0.5% BSA                                                                                                                                                                                                                                                                                              | Washing and surface staining:<br>PBS +0.01%<br>NaAzide + 1%<br>EDTA +5%<br>FCS<br>Tetramner staining buffer:<br>PBS +0.01% | Washing and surface staining:<br>PBS +0.01%<br>NaAzide +2mM<br>EDTA +2% FCS<br>Tetramer staining buffer:<br>PBS +0.01%<br>NaAzide +2mM<br>EDTA +50% | PBS for Live Dead Aqua; PFEA (2% FCS, 0.4% EDTA and 0.1% natrium acid in PBS) for surface Ab | Washing and surface staining:<br>PBS +0.01%<br>NaAzide +0.5%<br>BSA<br>Tetramer staining buffer:<br>PBS +0.1%<br>NaAzide +50%<br>FCS | PBS + 0.2%<br>BSA +5mM<br>EDTA +0.1%<br>Sodium azide |

|                                                        |                                                      |                                                            |                                                            |                                                            |                                                            |                                                            |                                                            |
|--------------------------------------------------------|------------------------------------------------------|------------------------------------------------------------|------------------------------------------------------------|------------------------------------------------------------|------------------------------------------------------------|------------------------------------------------------------|------------------------------------------------------------|
|                                                        |                                                      |                                                            | NaAzide + 2%<br>EDTA +50%<br>FCS                           | FCS                                                        |                                                            |                                                            |                                                            |
| <b>2B – Assay</b>                                      | Cells rested before staining?                        | No                                                         | No                                                         | No                                                         | No                                                         | No                                                         | No                                                         |
|                                                        | Staining volume                                      | 100µl                                                      | 50µl                                                       | 50µl                                                       | NK                                                         | 50µl                                                       | NK                                                         |
|                                                        | MHC multimer concentration                           | 5µg/mL                                                     | 5µg/mL                                                     | 5µg/mL                                                     | 5µg/mL                                                     | 5µg/mL                                                     | 5µg/mL                                                     |
|                                                        | Incubation conditions                                | Tetramer: 30 mins RT, dark<br>Surface: 20 mins 4-8 C, dark | Tetramer: 30 mins RT, dark<br>Surface: 20 mins 4-8 C, dark | Tetramer: 30 mins RT, dark<br>Surface: 20 mins 4-8 C, dark | Tetramer: 30 mins RT, dark<br>Surface: 30 mins 4-8 C, dark | Tetramer: 30 mins RT, dark<br>Surface: 15 mins 4-8 C, dark | Tetramer: 30 mins RT, dark<br>Surface: 15 mins 4-8 C, dark |
|                                                        | mAbs<br>Fluorochrome;<br>Company (cat number); clone |                                                            |                                                            |                                                            |                                                            |                                                            |                                                            |
|                                                        | CD3                                                  | PB; Dako (PB982)<br>UCHT1                                  | PB; BD (558117);<br>UCHT1                                  | APC; Caltag;<br>S4.1                                       | APC-H7; BD (641397); SK7                                   | HV450; BD (560365);<br>UCHT1                               | APC-Alexa-Fluor 750; BC (A94680); UCHT1                    |
|                                                        | CD8                                                  | APC; Dako (C7227); DK25                                    | PE Cy7; BC (737661);<br>SFCI21Thy2D3                       | PE-Cy7; Beckman Coulter;<br>SFCI21Thy2D3                   | Qdot 705; Invitrogen (Q10059); 3B5                         | PerCP Cy5.5; BD (560662);<br>RPA-T8                        | APC ; BC (IM2469) ; B9.11                                  |
|                                                        | CD4                                                  | PE-Cy7; BD (557852) SK3                                    | APC Cy7; BD (341115); SK3                                  | APC-Cy7; BD; RPA-T4                                        | Qdot 605; Invitrogen; S3.5                                 | APC-H7; BD (641398); SK3                                   | PB; BC (A82789);<br>13B8.2                                 |
|                                                        | Dead cell dye                                        | Propidium Iodide                                           | 7-AAD; BC (A07704)                                         | No                                                         | Aqua; Invitrogen; (L34957)                                 | Aqua; Invitrogen (L34957)                                  | Vivid Aqua; Invitrogen (L34957)                            |
|                                                        | Dump channel?                                        | No                                                         | No                                                         | No                                                         | No                                                         | No                                                         | No                                                         |
|                                                        | Cells fixed?                                         | No                                                         | No                                                         | Yes. 1% formaldehyde                                       | Yes. 1% formaldehyde                                       | No                                                         | No                                                         |
| <b>2C – Controls</b>                                   | Internal assay controls                              | HIV-multimer used as a negative control                    |                                                            |                                                            |                                                            |                                                            |                                                            |
| <b>Module 3 – Data acquisition (Multimer staining)</b> |                                                      | <b>Centre A</b>                                            | <b>Centre B</b>                                            | <b>Centre C</b>                                            | <b>Centre D</b>                                            | <b>Centre E</b>                                            | <b>Centre F</b>                                            |

|                                             |                                                                        |                                                                                                                                                                                                                                                                                                                                                  |                                                       |                                 |                                 |                                 |                                          |
|---------------------------------------------|------------------------------------------------------------------------|--------------------------------------------------------------------------------------------------------------------------------------------------------------------------------------------------------------------------------------------------------------------------------------------------------------------------------------------------|-------------------------------------------------------|---------------------------------|---------------------------------|---------------------------------|------------------------------------------|
| <b>3A – Equipment and software</b>          | Flow cytometer and software for acquisition                            | BD LSR Fortessa;<br>BD FACS DIVA 6.2                                                                                                                                                                                                                                                                                                             | BD FACS Canto II serial number: V96301151; Diva 6.1.3 | BD FACS Canto II; Diva 6.1.2    | BD LSR II; DIVA 6.1.2           | BD FACS Canto II; Diva 6.1.2    | Gallios flow cytometer; Gallios Software |
|                                             | Software for analysis                                                  | FlowJo software (Treestar Inc., Ashland, USA.)                                                                                                                                                                                                                                                                                                   |                                                       |                                 |                                 |                                 |                                          |
| <b>3B – Acquisition strategy and gating</b> |                                                                        | Samples were acquired by participating centres. All raw data (FCS files) were returned to the organising centre for centralised gating.                                                                                                                                                                                                          |                                                       |                                 |                                 |                                 |                                          |
|                                             | Detailed gating strategy                                               | Samples were firstly gated on a live cell population (except Centre C). A lymphocyte gate based on size and granularity followed, before defining CD3+CD4-CD8+multimer+ cells. As the donors were known to be HIV seronegative, HIV-multimer+ populations were used as a negative control and test antigen multimer+ gates were set accordingly. |                                                       |                                 |                                 |                                 |                                          |
|                                             | Representative data set<br>Post-IVS<br>Multimer<br>Phase II<br>Donor 5 |                                                                                                                                                                                                                                                                                                                                                  |                                                       |                                 |                                 |                                 |                                          |
|                                             | Review of raw data?                                                    | All dot plots (test and control) were examined by 3 independent analysts in a blinded fashion and scores were given based upon both the frequency and appearance of multimer+ T-cells - (2) a clustered population, (1) ambiguous population (0) clearly negative. A positive response was defined as a combined score of ≥5.                    |                                                       |                                 |                                 |                                 |                                          |
|                                             | Mean % multimer+ T-cells<br>Donors 1-3 (I)<br>Donors 4-5 (II)          | <b>Centre A</b>                                                                                                                                                                                                                                                                                                                                  | <b>Centre B</b>                                       | <b>Centre C</b>                 | <b>Centre D</b>                 | <b>Centre E</b>                 | <b>Centre F</b>                          |
|                                             | <b>Phase I – FLU response</b>                                          | Ex vivo: 0.57<br>Post-IVS: 20.7                                                                                                                                                                                                                                                                                                                  | Ex vivo: 0.13<br>Post-IVS: 1.6                        | Ex vivo: 0.21<br>Post-IVS: 22.2 | Ex vivo: 0.61<br>Post-IVS: 42.6 | Ex vivo: 0.09<br>Post-IVS: 23.8 | Ex vivo: N/A<br>Post-IVS: N/A            |
|                                             | <b>Phase I – CMV response</b>                                          | Ex vivo: ND<br>Post-IVS: ND                                                                                                                                                                                                                                                                                                                      | Ex vivo: ND<br>Post-IVS: ND                           | Ex vivo: ND<br>Post-IVS: 0.08   | Ex vivo: ND<br>Post-IVS: 0.12   | Ex vivo: ND<br>Post-IVS: ND     | Ex vivo: N/A<br>Post-IVS: N/A            |



|                                               |                                                                          |                                                                                            |                                                                                      |                                |                                           |                                           |                                |
|-----------------------------------------------|--------------------------------------------------------------------------|--------------------------------------------------------------------------------------------|--------------------------------------------------------------------------------------|--------------------------------|-------------------------------------------|-------------------------------------------|--------------------------------|
|                                               | <b>Phase I</b> – HIV response                                            | Ex vivo: ND<br>Post-IVS: ND                                                                | Ex vivo: ND<br>Post-IVS: ND                                                          | Ex vivo: ND<br>Post-IVS: ND    | Ex vivo: ND<br>Post-IVS: ND               | Ex vivo: ND<br>Post-IVS: ND               | Ex vivo: N/A<br>Post-IVS: N/A  |
|                                               | <b>Phase II</b> – EBV response                                           | Ex vivo: N/A<br>Post-IVS: 39.2                                                             | Ex vivo: N/A<br>Post-IVS: 34.5                                                       | Ex vivo: N/A<br>Post-IVS: 37.9 | Ex vivo: N/A<br>Post-IVS: 29.4            | Ex vivo: N/A<br>Post-IVS: 20.0            | Ex vivo: N/A<br>Post-IVS: 49.6 |
|                                               | <b>Phase II</b> – FLU response                                           | Ex vivo: N/A<br>Post-IVS: 2.5                                                              | Ex vivo: N/A<br>Post-IVS: 2.7                                                        | Ex vivo: N/A<br>Post-IVS: 1.7  | Ex vivo: N/A<br>Post-IVS: 2.1             | Ex vivo: N/A<br>Post-IVS: 0.5             | Ex vivo: N/A<br>Post-IVS: 2.3  |
|                                               | <b>Phase II</b> – WT1 response                                           | Ex vivo: N/A<br>Post-IVS: 0.12                                                             | Ex vivo: N/A<br>Post-IVS: 0.10                                                       | Ex vivo: N/A<br>Post-IVS: 0.09 | Ex vivo: N/A<br>Post-IVS: 0.09            | Ex vivo: N/A<br>Post-IVS: 0.06            | Ex vivo: N/A<br>Post-IVS: 0.06 |
|                                               | <b>Phase II</b> – HIV response                                           | Ex vivo: N/A<br>Post-IVS: ND                                                               | Ex vivo: N/A<br>Post-IVS: ND                                                         | Ex vivo: N/A<br>Post-IVS: ND   | Ex vivo: N/A<br>Post-IVS: ND              | Ex vivo: N/A<br>Post-IVS: ND              | Ex vivo: N/A<br>Post-IVS: ND   |
| <b>Module 4 – Results (Multimer staining)</b> |                                                                          | <b>Centre A</b>                                                                            | <b>Centre B</b>                                                                      | <b>Centre C</b>                | <b>Centre D</b>                           | <b>Centre E</b>                           | <b>Centre F</b>                |
| <b>4A – Raw data</b>                          | Cut off specifications and # of tests OOS                                | Phase I, 1 replicate post-IVS, all donors                                                  | Phase II, 1 replicate post-IVS, donor 4                                              | N/A                            | Phase I, ex vivo, donor 1                 | Phase I, 1 replicate, ex vivo, all donors | N/A                            |
|                                               | Accessibility of raw data addressed?                                     | Raw data may be made available upon request.                                               |                                                                                      |                                |                                           |                                           |                                |
| <b>4B – Response determination</b>            | Definition of positive reactivity (above background) incl. tests applied | Following review of data (see 3B), a score of $\geq 5$ was defined as a positive response. |                                                                                      |                                |                                           |                                           |                                |
|                                               | Response definition pre-defined or post-hoc                              | Post-hoc                                                                                   |                                                                                      |                                |                                           |                                           |                                |
| <b>Module 5</b>                               |                                                                          | <b>Centre A</b>                                                                            | <b>Centre B</b>                                                                      | <b>Centre C</b>                | <b>Centre D</b>                           | <b>Centre E</b>                           | <b>Centre F</b>                |
| <b>5A – General lab operation</b>             | Guidance of lab operations                                               | Exploratory research                                                                       | Exploratory research                                                                 | Exploratory research           | Exploratory research and GCLP             | Work to GCLP principles                   | GLP                            |
| <b>5B – Standardisation</b>                   | Status of protocols                                                      | SOP                                                                                        | Standardised protocols for MULTIMER staining and ELISPOT à all steps covered by SOPs | Established protocol           | SOP                                       | SOP                                       | SOP                            |
| <b>5C – Qualification /validation</b>         | Status of assays                                                         | ELISPOT: Optimised/qualified                                                               | ELISPOT and Multimer:                                                                | ELISPOT and Multimer:          | ELISPOT: Validated<br>Multimer: Optimised | ELISPOT and Multimer:                     | ELISPOT: Validated             |

|  |  |                         |                             |                             |  |                         |                     |
|--|--|-------------------------|-----------------------------|-----------------------------|--|-------------------------|---------------------|
|  |  | Multimer: Non-validated | Optimised and pre-validated | Optimised and non-validated |  | Optimised and validated | Multimer: Optimised |
|--|--|-------------------------|-----------------------------|-----------------------------|--|-------------------------|---------------------|

N/A, Not applicable; ND, Not Detected; NK, Not Known; P/S, Penicillin and Streptomycin; o/n, overnight; SOP, Standard Operating Procedure.

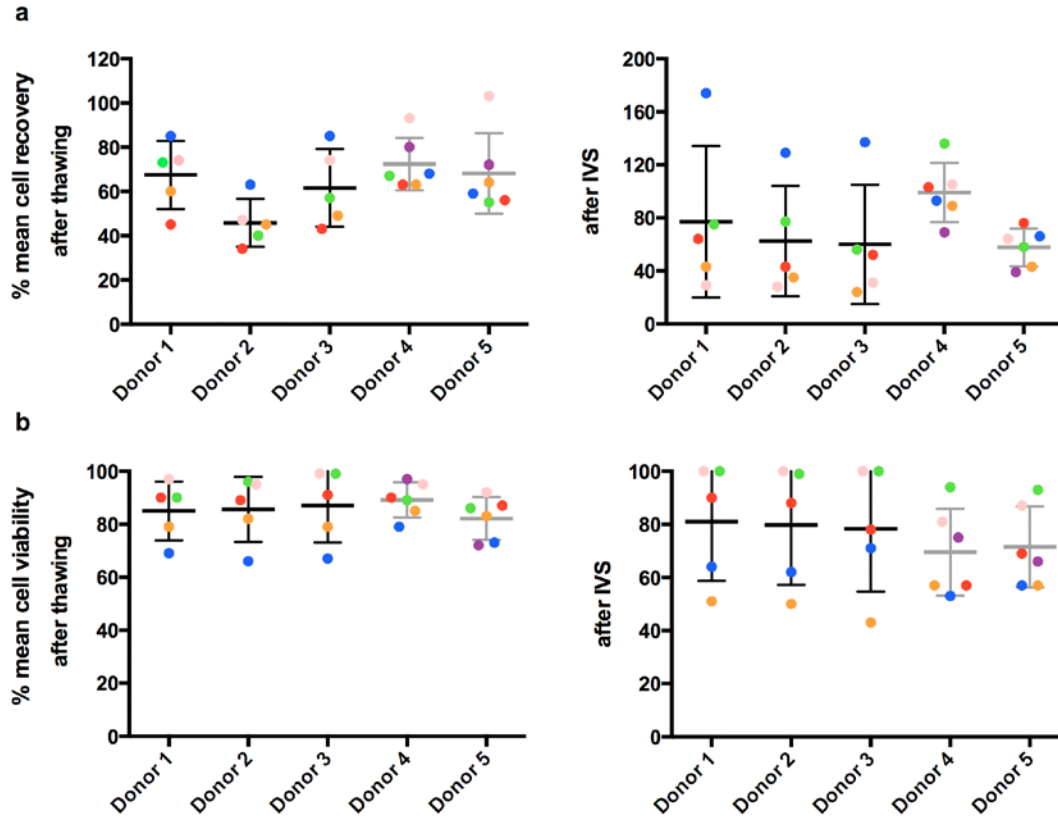

**Supplementary Fig. 1 Cell recovery and cell viability upon thawing and post-IVS in Phase I and II** Cell recovery (a) and cell viability (b) of 5 donors (1-5) were assessed after initial thawing (*left*) and post-IVS (*right*); data for each centre represent a mean of  $\geq 3$  repeats. Donors 1-3 and 4-5 featured in Phase I (*black error bars*) and II (*grey error bars*), respectively. Centre A, blue; Centre B, red; Centre C, green; Centre D, orange; Centre E, pink; Centre F, purple.

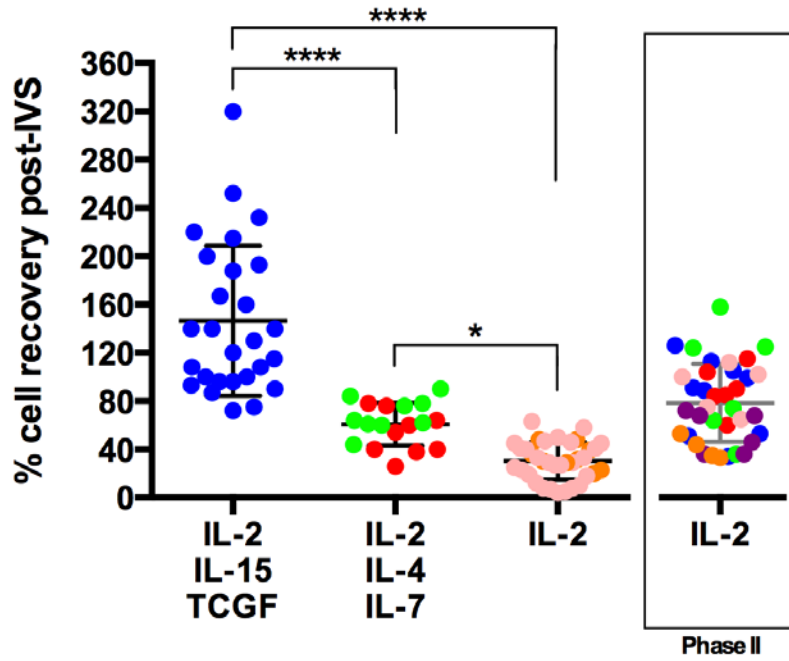

**Supplementary Fig. 2 Effect of cytokines on cell recovery post-IVS in Phase I (and II)**

Cell recovery, relative to the cell number plated on day 1, of 3 donors (1-3) was assessed post-IVS in Phase I; data for each centre represent individual IVS experiments. For comparison, cell recovery post-harmonised IVS in Phase II is also shown for donors 4-5 (*boxed*). Centre A, blue; Centre B, red; Centre C, green; Centre D, orange; Centre E, pink; Centre F, purple. \*\*\*\* $P < 0.0001$ , \* $P < 0.01$

**Supplementary Table 1****A list of HLA-A\*0201-restricted epitopes for ELISPOT and multimer analyses**

| <b>Antigen</b> | <b>Protein</b> | <b>Position</b> | <b>Sequence</b> |
|----------------|----------------|-----------------|-----------------|
| Human CMV      | pp65           | 495-503         | NLVPMVATV       |
| EBV            | BMLF1          | 280-288         | GLCTLVAML       |
| FLU            | M1             | 58-66           | GILGFVFTL       |
| HIV-1          | Pol (RT)       | 476-484         | ILKEPVHGV       |
| -              | WT1            | 37-45           | VLDFAPPGA       |

**Supplementary Table 2**

**Mean fold increase ( $\pm$  SD) of FLU-specific responses post-IVS as detected by ELISPOT and multimer staining for centres A-E in Phase I**

|                 |                | <b>Centre A</b>  | <b>Centre B</b>   | <b>Centre C</b>  | <b>Centre D</b>   | <b>Centre E</b>   | <b>Mean</b>       |
|-----------------|----------------|------------------|-------------------|------------------|-------------------|-------------------|-------------------|
| <b>ELISPOT</b>  | <b>Donor 1</b> | 259.2 $\pm$ 25.8 | 29.2 $\pm$ 22.1   | 150.3 $\pm$ 20.3 | 190.8 $\pm$ 81.0  | 89.0 $\pm$ 93.2   | 135.5 $\pm$ 93.5  |
|                 | <b>Donor 2</b> | 116.4 $\pm$ 25.0 | 103.3 $\pm$ 151.8 | 122.0 $\pm$ 67.6 | 130.8 $\pm$ 29.0  | 83.4 $\pm$ 41.7   | 110.8 $\pm$ 70.7  |
|                 | <b>Donor 3</b> | 242.7 $\pm$ 3.8  | 6.9 $\pm$ 1.4     | 105.1 $\pm$ 27.0 | 948.5 $\pm$ 249.9 | 160.8 $\pm$ 95.4  | 318.6 $\pm$ 382.1 |
|                 | <b>Mean</b>    | 206.1 $\pm$ 18.2 | 46.5 $\pm$ 58.4   | 125.8 $\pm$ 38.3 | 423.3 $\pm$ 120.0 | 111.1 $\pm$ 76.7  | 185.1 $\pm$ 238.5 |
| <b>Multimer</b> | <b>Donor 1</b> | 74.4 $\pm$ 0.5   | 17.4 $\pm$ 10.7   | 225.5 $\pm$ 85.6 | 195.5 $\pm$ 215.8 | 251.8 $\pm$ 352.9 | 147.7 $\pm$ 163.0 |
|                 | <b>Donor 2</b> | 80.2 $\pm$ 3.5   | 18.2 $\pm$ 20.6   | 114.0 $\pm$ 91.0 | 101.0 $\pm$ 34.5  | 325.8 $\pm$ 441.6 | 116.3 $\pm$ 167.0 |
|                 | <b>Donor 3</b> | 8.9 $\pm$ 8.3    | 2.1 $\pm$ 0.1     | 22.3 $\pm$ 12.8  | 38.7 $\pm$ 21.8   | 70.2 $\pm$ 96.3   | 28.8 $\pm$ 38.9   |
|                 | <b>Mean</b>    | 54.5 $\pm$ 4.1   | 12.6 $\pm$ 10.5   | 120.6 $\pm$ 63.1 | 111.7 $\pm$ 90.7  | 216.0 $\pm$ 297.0 | 98.1 $\pm$ 142.9  |

**Supplementary Table 3**

**Inter-assay % coefficient of variation for FLU and CMV responses as detected by *ex vivo* and post-IVS ELISPOT and multimer staining for centres A-E in Phase I**

|     |          | ELISPOT: Inter-assay %CV |          |          |          |                  |       | Multimer: Inter-assay %CV |          |          |          |          |       |      |
|-----|----------|--------------------------|----------|----------|----------|------------------|-------|---------------------------|----------|----------|----------|----------|-------|------|
|     |          | Centre A                 | Centre B | Centre C | Centre D | Centre E         | Mean  | Centre A                  | Centre B | Centre C | Centre D | Centre E | Mean  |      |
| FLU | Ex vivo  | Donor 1                  | 24.0     | 23.2     | 14.4     | 38.0             | 23.3  | 24.6                      | 25.1     | 24.2     | 14.4     | 87.0     | 1.1   | 30.4 |
|     |          | Donor 2                  | 42.5     | 74.5     | 16.2     | 23.3             | 7.6   | 32.8                      | 6.0      | 29.7     | 19.0     | 43.4     | 23.9  | 24.4 |
|     |          | Donor 3                  | 112.0    | 122.6    | 55.4     | 22.7             | 9.9   | 64.5                      | 85.2     | 30.9     | 56.1     | 47.9     | 4.7   | 45.0 |
|     |          | Mean                     | 59.5     | 73.4     | 28.7     | 28.0             | 13.6  | 40.6                      | 38.8     | 28.3     | 29.8     | 59.4     | 9.9   | 33.3 |
|     | Post-IVS | Donor 1                  | 8.2      | 77.9     | 26.4     | N/A <sup>a</sup> | 74.1  | 46.7                      | 1.5      | 46.8     | 48.7     | 32.2     | 87.8  | 43.4 |
|     |          | Donor 2                  | 22.5     | 88.1     | 39.9     | N/A <sup>a</sup> | 44.7  | 48.8                      | 1.0      | 90.4     | 65.0     | 6.6      | 83.5  | 49.3 |
|     |          | Donor 3                  | 52.8     | 57.3     | 37.7     | N/A <sup>a</sup> | 54.7  | 50.6                      | 107.0    | 42.4     | 32.0     | 40.0     | 86.9  | 61.7 |
|     |          | Mean                     | 27.8     | 74.4     | 34.7     | N/A <sup>a</sup> | 57.8  | 48.7                      | 36.5     | 59.9     | 48.6     | 26.3     | 86.1  | 51.5 |
| CMV | Ex vivo  | Donor 1                  | 128.9    | 89.2     | 173.2    | 173.2            | 0.0   | 141.1                     | 8.2      | 36.3     | 13.6     | 90.8     | 99.0  | 49.6 |
|     |          | Donor 2                  | 21.6     | 173.2    | 86.6     | 86.6             | 0.0   | 92.0                      | 22.7     | 48.7     | 40.1     | 42.2     | 31.5  | 37.0 |
|     |          | Donor 3                  | 120.2    | 137.8    | 120.2    | 173.2            | 173.2 | 144.9                     | 70.4     | 34.8     | 114.0    | 65.2     | 18.4  | 60.6 |
|     |          | Mean                     | 90.2     | 133.4    | 126.7    | 144.3            | 57.7  | 126.0                     | 33.8     | 39.9     | 55.9     | 66.1     | 49.6  | 49.1 |
|     | Post-IVS | Donor 1                  | 141.4    | 29.6     | 124.8    | 173.2            | 0.0   | 117.3                     | 2.6      | 72.2     | 65.8     | 164.0    | 47.2  | 70.4 |
|     |          | Donor 2                  | 81.2     | 173.2    | 9.0      | 173.2            | 173.2 | 122.0                     | 2.7      | 62.9     | 128.6    | 133.9    | 164.2 | 98.5 |
|     |          | Donor 3                  | 141.4    | 0.0      | 173.2    | 173.2            | 89.8  | 144.4                     | 2.0      | 46.8     | 34.1     | 154.2    | 60.5  | 59.5 |
|     |          | Mean                     | 121.3    | 67.6     | 102.3    | 173.2            | 87.7  | 127.9                     | 2.4      | 60.6     | 76.2     | 150.7    | 90.6  | 76.1 |

<sup>a</sup>Test wells were saturated with SFC too numerous to count; these wells were reported with a maximum spot number of 2000.  
Not applicable, N/A

**Supplementary Table 4**

**Inter-assay % coefficient of variation for EBV, FLU and WT1.37 responses as detected by post-harmonized IVS ELISPOT and multimer staining for centres A-F in Phase II**

**ELISPOT: Inter-assay %CV**

|            |                | Centre A | Centre B | Centre C | Centre D | Centre E | Centre F | Mean |
|------------|----------------|----------|----------|----------|----------|----------|----------|------|
| <b>EBV</b> | <b>Donor 4</b> | 8.3      | 2.8      | 32.4     | 72.9     | 18.2     | 47.2     | 30.3 |
|            | <b>Donor 5</b> | 27.9     | 47.3     | 74.2     | 139.6    | 60.2     | 46.8     | 66.0 |
|            | <b>Mean</b>    | 18.1     | 25.1     | 53.3     | 106.3    | 39.2     | 47.0     | 48.2 |
| <b>FLU</b> | <b>Donor 4</b> | 30.6     | 22.8     | 107.7    | 36.0     | 23.1     | 48.5     | 44.8 |
|            | <b>Donor 5</b> | 47.1     | 80.7     | 63.9     | 135.5    | 41.3     | 125.2    | 82.3 |
|            | <b>Mean</b>    | 38.9     | 51.8     | 85.8     | 85.8     | 32.2     | 86.9     | 63.6 |
| <b>WT1</b> | <b>Donor 4</b> | N/A      | N/A      | N/A      | N/A      | N/A      | N/A      | N/A  |
|            | <b>Donor 5</b> | N/A      | N/A      | N/A      | N/A      | N/A      | N/A      | N/A  |
|            | <b>Mean</b>    | N/A      | N/A      | N/A      | N/A      | N/A      | N/A      | N/A  |

**Multimer: Inter-assay %CV**

| Centre A | Centre B | Centre C | Centre D | Centre E | Centre F | Mean |
|----------|----------|----------|----------|----------|----------|------|
| 37.3     | 16.0     | 15.6     | 42.2     | 24.0     | 22.2     | 26.2 |
| 61.8     | 73.6     | 29.2     | 122.4    | 40.3     | 56.0     | 63.9 |
| 49.6     | 44.8     | 22.4     | 82.3     | 32.2     | 39.1     | 45.1 |
| 42.6     | 29.7     | 49.5     | 44.6     | 75.4     | 23.5     | 44.2 |
| 25.9     | 71.5     | 48.6     | 96.0     | 58.1     | 55.6     | 59.3 |
| 34.3     | 50.6     | 49.1     | 70.3     | 66.8     | 39.6     | 51.8 |
| 142.3    | 23.1     | 66.3     | 19.6     | 16.6     | 96.1     | 60.7 |
| 47.0     | 27.6     | 58.1     | 44.5     | 58.1     | 14.6     | 41.7 |
| 94.7     | 25.4     | 62.2     | 32.1     | 37.4     | 55.4     | 51.2 |

Not applicable, N/A



**Supplementary Table 5**

**Inter-lab % coefficient of variation for FLU and CMV responses as detected by *ex vivo* and post-IVS ELISPOT and multimer staining for centres A-E in Phase I**

|            |                       | <b>ELISPOT: Inter-lab %CV</b> |                |                |             | <b>Multimer: Inter-lab %CV</b> |                |                |             |
|------------|-----------------------|-------------------------------|----------------|----------------|-------------|--------------------------------|----------------|----------------|-------------|
|            |                       | <b>Donor 1</b>                | <b>Donor 2</b> | <b>Donor 3</b> | <b>Mean</b> | <b>Donor 1</b>                 | <b>Donor 2</b> | <b>Donor 3</b> | <b>Mean</b> |
| <b>FLU</b> | <b><i>Ex vivo</i></b> | 29.8                          | 50.7           | 120.2          | 66.9        | 90.9                           | 65.9           | 92.8           | 83.2        |
|            | <b>Post-IVS</b>       | 65.1                          | 69.9           | 118.8          | 84.6        | 75.1                           | 73.1           | 105.7          | 84.6        |
| <b>CMV</b> | <b><i>Ex vivo</i></b> | 170.7                         | 141.6          | 177.3          | 163.2       | 133.3                          | 102.8          | 108.9          | 115.0       |
|            | <b>Post-IVS</b>       | 221.9                         | 240.9          | 188.9          | 217.2       | 324.0                          | 149.0          | 246.5          | 239.8       |

**Supplementary Table 6****Inter-lab % coefficient of variation for EBV, FLU and WT1 responses as detected by post-harmonized IVS ELISPOT and multimer staining for centres A-F in Phase II**

|            | <b>ELISPOT: Inter-lab %CV</b> |                |             | <b>Multimer: Inter-lab %CV</b> |                |             |
|------------|-------------------------------|----------------|-------------|--------------------------------|----------------|-------------|
|            | <b>Donor 4</b>                | <b>Donor 5</b> | <b>Mean</b> | <b>Donor 4</b>                 | <b>Donor 5</b> | <b>Mean</b> |
| <b>EBV</b> | 41.6                          | 73.3           | 57.5        | 38.4                           | 63.4           | 50.9        |
| <b>FLU</b> | 77.4                          | 89.8           | 83.6        | 65.5                           | 66.5           | 66.0        |
| <b>WT1</b> | N/A                           | N/A            | N/A         | 162.1                          | 64.5           | 113.3       |

Not applicable, N/A

**Supplementary Table 7**

**Correlation of *ex vivo* with post-IVS responses and ELISPOT with multimer responses from Phase I and II**

|                 |                | <b>ELISPOT<br/><i>Ex vivo</i> : Post-IVS<br/>(FLU)</b> | <b>Multimer<br/><i>Ex vivo</i> : Post-IVS<br/>(FLU)</b> | <b><i>Ex vivo</i><br/>ELISPOT : Multimer<br/>(FLU)</b> | <b>Post-IVS<br/>ELISPOT : Multimer<br/>(FLU/FLU&amp;EBV)</b> |
|-----------------|----------------|--------------------------------------------------------|---------------------------------------------------------|--------------------------------------------------------|--------------------------------------------------------------|
| <b>Phase I</b>  | <b>Donor 1</b> | R <sup>2</sup> = 0.2459<br>P = 0.0714                  | R <sup>2</sup> = 0.0897<br>P = 0.3442                   | R <sup>2</sup> = 0.0860<br>P = 0.3310                  | R <sup>2</sup> = 0.5988<br><b>P = 0.0012</b>                 |
|                 | <b>Donor 2</b> | R <sup>2</sup> = 0.5411<br><b>P = 0.0027</b>           | R <sup>2</sup> = 0.3882<br>P = 0.0229                   | R <sup>2</sup> = 0.1726<br>P = 0.1396                  | R <sup>2</sup> = 0.3829<br>P = 0.0183                        |
|                 | <b>Donor 3</b> | R <sup>2</sup> = 0.0203<br>P = 0.6274                  | R <sup>2</sup> = 0.2413<br>P = 0.0883                   | R <sup>2</sup> = 0.2794<br>P = 0.0520                  | R <sup>2</sup> = 0.5302<br><b>P = 0.0031</b>                 |
| <b>Phase II</b> | <b>Donor 4</b> | N/A                                                    | N/A                                                     | N/A                                                    | R <sup>2</sup> = 0.7685<br><b>P &lt; 0.0001</b>              |
|                 | <b>Donor 5</b> | N/A                                                    | N/A                                                     | N/A                                                    | R <sup>2</sup> = 0.3424<br><b>P = 0.0002</b>                 |
|                 |                | R <sup>2</sup> = 0.3312<br><b>P &lt; 0.0001</b>        | R <sup>2</sup> = 0.1244<br>P = 0.0299                   | R <sup>2</sup> = 0.1080<br>P = 0.0359                  | R <sup>2</sup> = 0.5113<br><b>P &lt; 0.0001</b>              |

Correlations were evaluated using the Pearson's correlation coefficient (R) and the coefficient of determination (R<sup>2</sup>)

Significance testing was via the Student's T-test with a confidence level of 99% (< 0.01%)

Not applicable, N/A
